# Supplementary material for: (n,m) Assignments and quantification for single-walled carbon nanotubes on SiO2/Si substrates by resonant Raman spectroscopy
Source: Royal Society of Chemistry journal article supplement (doi:10.1039/c5nr01076d), 2015-01-01
Supplement: c5nr01076d1.pdf [file c5nr01076d1.pdf]

## Supplementary Information for

# **$(n,m)$ Assignments and Quantification for Single-Walled Carbon Nanotubes on SiO<sub>2</sub>/Si Substrates by Resonant Raman Spectroscopy**

Daqi Zhang, Juan Yang\*, Feng Yang, Ruoming Li, Meihui Li, Dong Ji, and Yan Li\*

Beijing National Laboratory for Molecular Sciences, Key Laboratory for the Physics and Chemistry of Nanodevices, State Key Laboratory of Rare Earth Materials Chemistry and Applications, College of Chemistry and Molecular Engineering, Peking University, Beijing 100871, China.

\*To whom correspondence should be addressed. E-mail: [yang\\_juan@pku.edu.cn](mailto:yang_juan@pku.edu.cn)

**Supplementary Figures S1-S4**

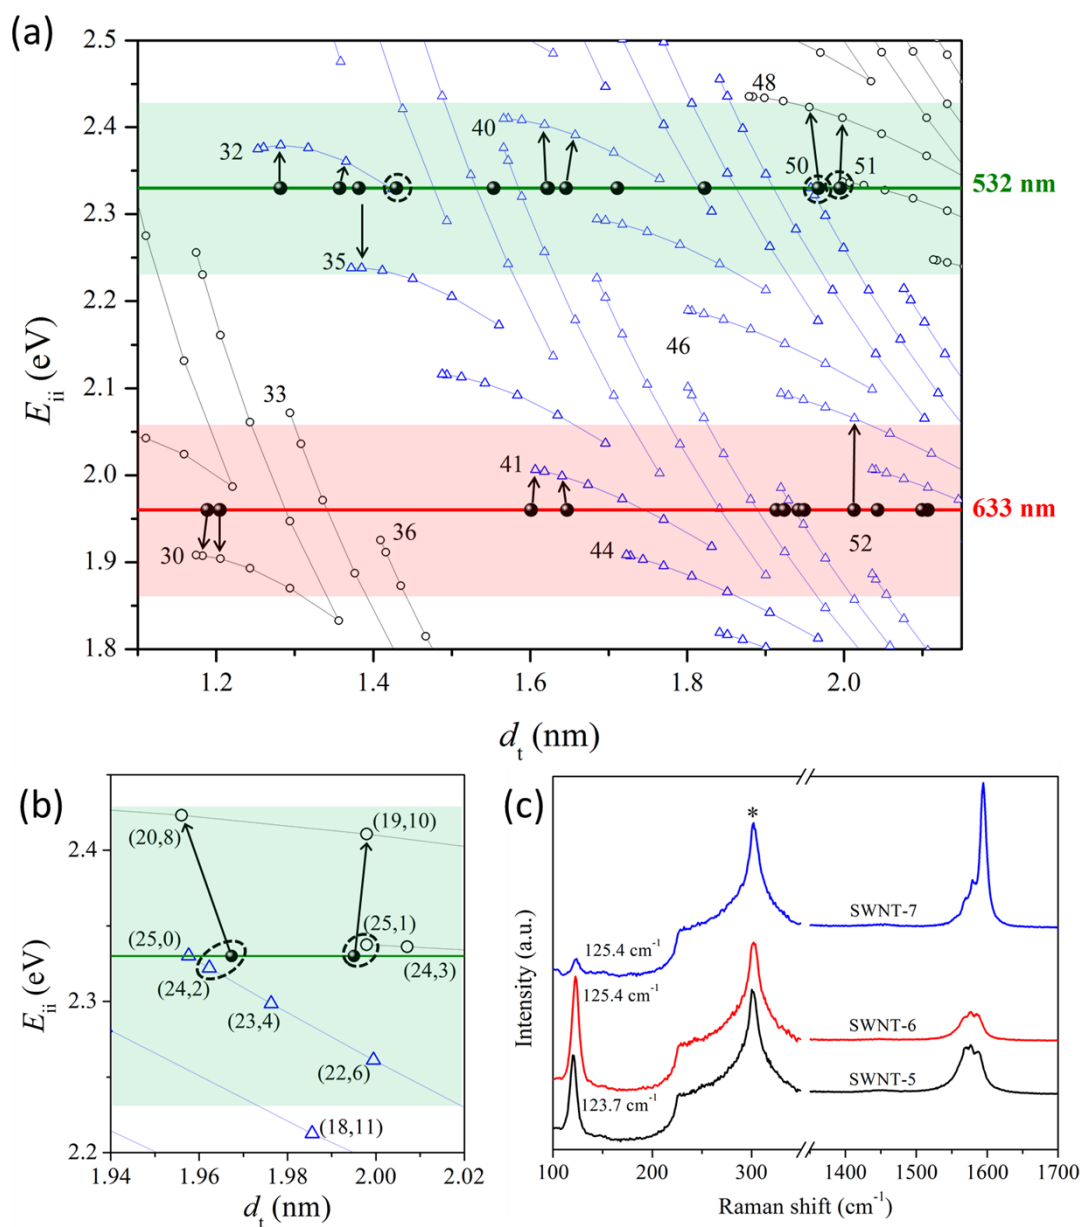

**Figure S1.** (a) Reference Kataura plot with data points of SWNTs on silicon substrates grown by Ni catalysts plotted according to  $d_t$  and excitation laser energy.  $d_t$  of the data points are calculated from  $\omega_{\text{RBM}}$  using  $d_t = 237.9 / (\omega_{\text{RBM}} - 4.1)$ . The  $(n,m)$  assignments are indicated by arrows or dashed circles. (b) The enlarged Kataura plot in range of  $E_{ii} = 2.20-2.45$  eV and  $d_t = 1.94-2.02$  nm, showing the assignments of three SWNTs. (c) Resonant Raman spectra of the three SWNTs in (b): a metallic tube with  $\omega_{\text{RBM}} = 123.7$   $\text{cm}^{-1}$  (SWNT-5, black), a metallic tube with  $\omega_{\text{RBM}} = 125.4$   $\text{cm}^{-1}$  (SWNT-6, red), and a semiconducting tube with  $\omega_{\text{RBM}} = 125.4$   $\text{cm}^{-1}$  (SWNT-7, blue). Peaks indicated by \* arise from silicon substrates.

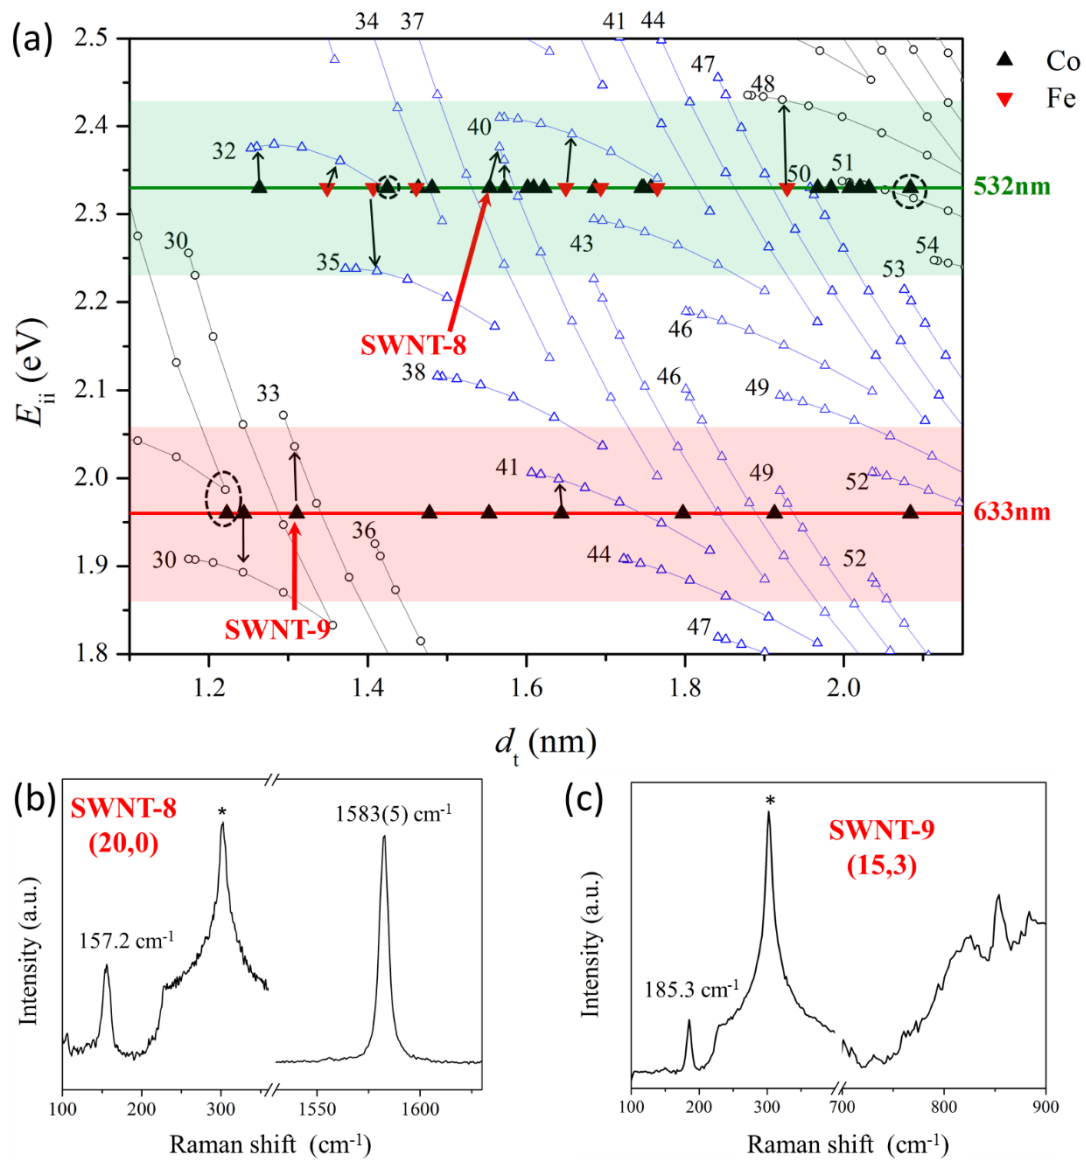

**Figure S2.** (a) Reference Kataura plot with data points of SWNTs on silicon substrates grown by Co and Fe catalysts plotted according to  $d_t$  and excitation laser energy.  $d_t$  of the data points are calculated from  $\omega_{\text{RBM}}$  using  $d_t = 237.9 / (\omega_{\text{RBM}} - 4.1)$ . The  $(n,m)$  assignments are indicated by arrows or dashed circles. (b) The resonant Raman spectra of SWNT-8, showing a single-component, symmetric Lorentzian G band shape and an  $\omega_{\text{RBM}}$  at 157.2  $\text{cm}^{-1}$  excited by 532 nm laser. (c) The resonant Raman spectra of SWNT-9, showing IFM features and an  $\omega_{\text{RBM}}$  at 185.3  $\text{cm}^{-1}$  excited by 633 nm laser. Peaks indicated by \* arise from silicon substrates.

Previously it was found that for SWNTs in the  $d_t$  range of 0.7-1.3 nm M-SWNTs gives larger  $B$  value than S-SWNTs.<sup>1</sup> In addition,  $\omega_{\text{RBM}}$  was also found to be  $\theta$ -dependent, with near-zigzag SWNTs showing negative deviation from the linear dependence whereas near-armchair SWNTs showing positive deviation. A modified relation of  $\omega_{\text{RBM}} = A/d_t + B + (C + D\cos^2 3\theta) / d_t^2$  was then proposed.<sup>1</sup> Moreover, a nonlinear formula of  $\omega_{\text{RBM}} = \frac{227}{d_t} \sqrt{1 + C_e \cdot d_t^2}$  was also reported with the constant 227 nm $\cdot$ cm $^{-1}$  in agreement with the elastic property of graphite and the parameter  $C_e$  reflecting the influence of the van der Waals interaction between SWNT and its surroundings.<sup>2</sup>

For our case, the inset in Figure 4 plots  $\Delta d_t$  with respect to  $\cos^2 3\theta$  for both S- (red dots) and M-SWNTs (black squares). The data points appear evenly along the  $\Delta d_t = 0$  line, showing little or nearly no  $\theta$ -dependence of  $\omega_{\text{RBM}}$ . Moreover, we do not observe any noticeable difference in the  $\omega_{\text{RBM}}-d_t$  relation between S- and M-SWNTs. Therefore, it is found that  $\omega_{\text{RBM}}$  of our random SWNTs on silicon substrates depends mainly on  $d_t$ .

If the nonlinear function of  $\omega_{\text{RBM}} = \left(\frac{227}{d_t}\right) \sqrt{1 + C_e \cdot d_t^2}$ <sup>2</sup> is used instead, it is found that the calculated  $C_e$  values for **SWNT-1** to **SWNT-10** differ significantly from one another. In addition, Figure S3 plots this non-linear fitting of  $\omega_{\text{RBM}}$  and  $d_t$  with a best fit  $C_e$  value of 0.065 nm $^{-2}$  and an  $R^2 = 0.988$ . As can be seen, small-diameter SWNTs show position deviation and large-diameter SWNTs give negative deviation from the fitting curve, suggesting that this non-linear fitting is not suitable for our samples. If the parameter of 227 nm $\cdot$ cm $^{-1}$  in the function is also allowed to vary

freely, the best fit non-linear equation is  $\omega_{\text{RBM}} = \left(\frac{240.2}{d_t}\right) \sqrt{1 + 0.015d_t^2}$  with an  $R^2=0.9991$ .

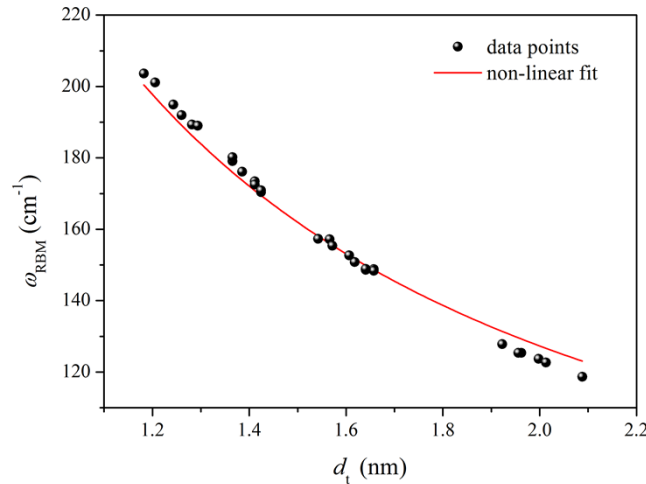

**Figure S3.** Non-linear fit of  $\omega_{\text{RBM}}$  with respect to  $d_t$  for the same set of data points in Figure 4.

The fitting curve is  $\omega_{\text{RBM}} = \left(\frac{227}{d_t}\right) \sqrt{1 + C_e \cdot d_t^2}$  with a best fit  $C_e = 0.065$  and an  $R^2 = 0.988$ .

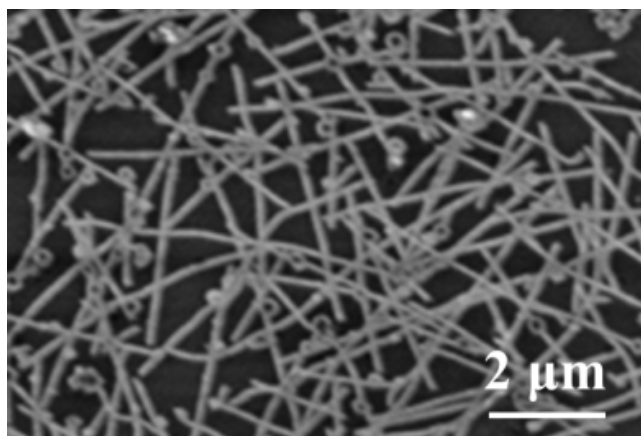

**Figure S4.** SEM image of a typical chirality-specified SWNT sample on silicon substrates catalyzed by  $\text{W}_6\text{Co}_7$ . The average density is about 6.7 SWNTs per spot of 1  $\mu\text{m}$  diameter calculated from 7 samples.

**Reference:**

(1) Jorio, A.; Fantini, C.; Pimenta, M.; Capaz, R.; Samsonidze, G. G.; Dresselhaus, G.; Dresselhaus, M.; Jiang, J.; Kobayashi, N.; Grüneis, A. *Phys Rev B* **2005**, *71*, 075401.

(2) Araujo, P.; Maciel, I.; Pesce, P.; Pimenta, M.; Doorn, S.; Qian, H.; Hartschuh, A.; Steiner, M.; Grigorian, L.; Hata, K.; Jorio, A. *Phys Rev B* **2008**, *77*, 241403.
